# Supplementary material
Source: HighWire-hosted journal article supplement (https://jnm.snmjournals.org/highwire/filestream/95003/field_highwire_adjunct_files/0/170225_Supplemental_Data.pdf)
Supplement: 170225_Supplemental_Data.pdf [file 170225_Supplemental_Data.pdf]

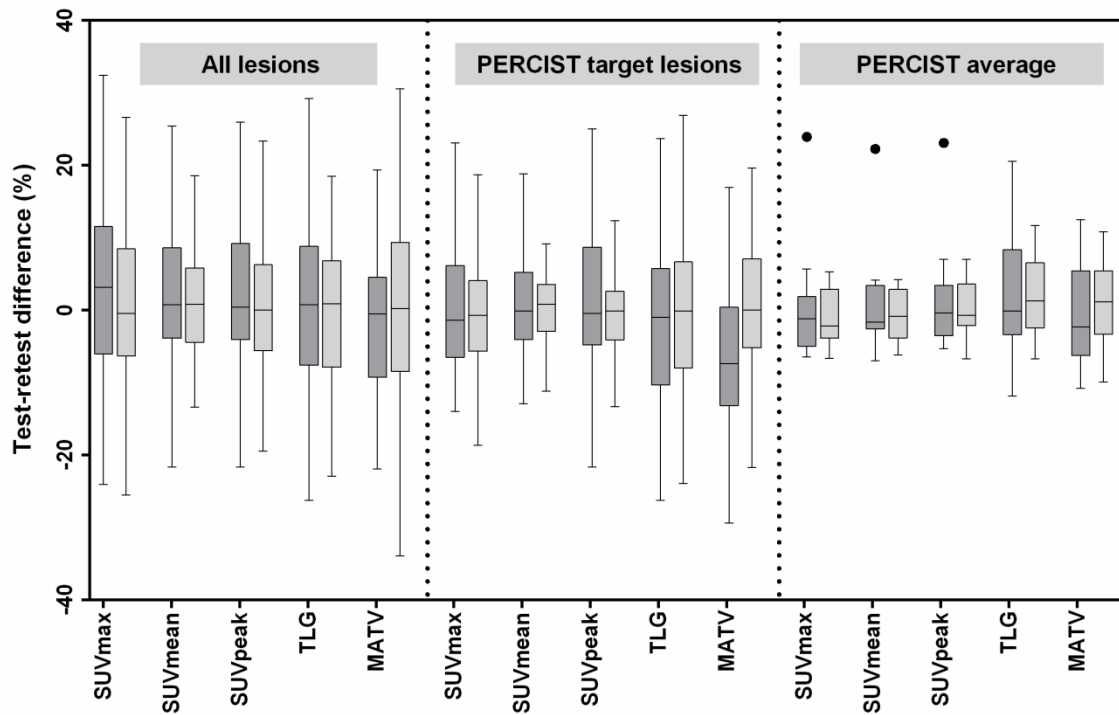

Supplemental Figure 1: Boxplots of the percentage differences between the test and retest scan as obtained from the 60 (dark) and 90 (light) minutes data with the outlier included in the analyses. The effect of lesion selection and averaging is shown on the different  $^{18}\text{F}$ -FDG uptake metrics.

Supplemental Table 1: The mean relative differences and repeatability coefficients (RC) for several uptake metrics with the influence of different uptake times and lesions selection with the outlier included.

| <i>Uptake time</i>        | <i>Quantitative tracer uptake measures</i> | <i>All lesions</i>         |               | <i>PERCIST-criteria *</i>  |               | <i>PERCIST-criteria averaged</i> |               |
|---------------------------|--------------------------------------------|----------------------------|---------------|----------------------------|---------------|----------------------------------|---------------|
|                           |                                            | <i>Mean difference (%)</i> | <i>RC (%)</i> | <i>Mean difference (%)</i> | <i>RC (%)</i> | <i>Mean difference (%)</i>       | <i>RC (%)</i> |
| 60 minutes post-injection | SUVmax                                     | 4.6                        | 28.9          | 1.5                        | 21.7          | 1.0                              | 17.2          |
|                           | SUVmean                                    | 3.1                        | 21.9          | 1.4                        | 20.5          | 1.0                              | 15.9          |
|                           | SUVpeak                                    | 3.1                        | 23.3          | 1.5                        | 22.1          | 1.7                              | 16.4          |
|                           | TLG                                        | 0.6                        | 30.8          | 0.8                        | 22.7          | 1.9                              | 18.9          |
|                           | MATV                                       | -2.4                       | 30.0          | -0.6                       | 21.1          | -0.5                             | 14.2          |
| 90 minutes post-injection | SUVmax                                     | 0.0                        | 22.8          | -1.0                       | 16.0          | -1.0                             | 8.0           |
|                           | SUVmean                                    | 0.2                        | 17.5          | -0.5                       | 12.1          | -0.8                             | 7.1           |
|                           | SUVpeak                                    | 0.0                        | 16.1          | 0.0                        | 12.4          | 0.0                              | 7.8           |
|                           | TLG                                        | 0.0                        | 24.5          | 1.4                        | 18.3          | 2.0                              | 11.3          |
|                           | MATV                                       | -0.1                       | 30.8          | 2.0                        | 22.5          | 1.0                              | 13.2          |

\* PERCIST-criteria: 5 hottest lesions, max. 2 per organ and minimum SUV >1.5 x mean liver SUV + 2SDs
